# Supplementary material for: Association of Serum MiR-142-3p and MiR-101-3p Levels with Acute Cellular Rejection after Heart Transplantation
Source: PubMed Central journal article supplement (PMC5268768; doi:10.1371/journal.pone.0170842), 2017-01-26

**S1 Fig. Mean Ct value of 7 microRNAs tested**

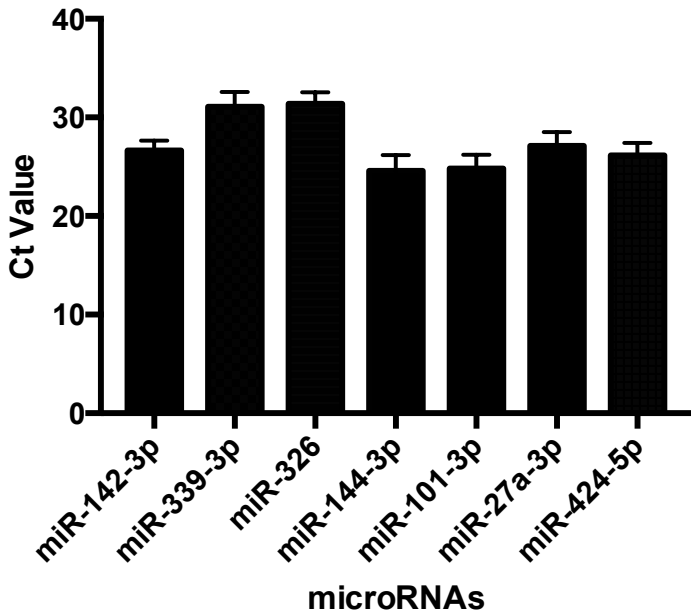

Supplement: pone.0170842.s001.pdf [file pone.0170842.s001.pdf]
