# Supplementary material for: Association of Serum MiR-142-3p and MiR-101-3p Levels with Acute Cellular Rejection after Heart Transplantation
Source: PubMed Central journal article supplement (PMC5268768; doi:10.1371/journal.pone.0170842), 2017-01-26
Supplement: pone.0170842.s002.pdf [file pone.0170842.s002.pdf]

**S1 Table. ROC analysis of miR-142-3p**

| Fold Change | Sensitivity% | 95% CI             | Specificity% | 95% CI            |
|-------------|--------------|--------------------|--------------|-------------------|
| > 0.1454    | 100          | 86.77% to 100%     | 2.703        | 0.0684% to 14.16% |
| > 0.178     | 100          | 86.77% to 100%     | 5.405        | 0.6615% to 18.19% |
| > 0.1896    | 100          | 86.77% to 100%     | 8.108        | 1.704% to 21.91%  |
| > 0.1997    | 100          | 86.77% to 100%     | 10.81        | 3.025% to 25.42%  |
| > 0.2316    | 100          | 86.77% to 100%     | 13.51        | 4.537% to 28.77%  |
| > 0.2638    | 100          | 86.77% to 100%     | 16.22        | 6.193% to 32.01%  |
| > 0.2957    | 100          | 86.77% to 100%     | 18.92        | 7.962% to 35.16%  |
| > 0.3207    | 100          | 86.77% to 100%     | 21.62        | 9.827% to 38.21%  |
| > 0.3239    | 100          | 86.77% to 100%     | 24.32        | 11.77% to 41.2%   |
| > 0.3253    | 100          | 86.77% to 100%     | 27.03        | 13.79% to 44.12%  |
| > 0.3269    | 100          | 86.77% to 100%     | 29.73        | 15.87% to 46.98%  |
| > 0.3325    | 100          | 86.77% to 100%     | 32.43        | 18.01% to 49.79%  |
| > 0.3486    | 100          | 86.77% to 100%     | 35.14        | 20.21% to 52.54%  |
| > 0.3928    | 100          | 86.77% to 100%     | 37.84        | 22.46% to 55.24%  |
| > 0.4391    | 100          | 86.77% to 100%     | 40.54        | 24.75% to 57.9%   |
| > 0.4576    | 100          | 86.77% to 100%     | 43.24        | 27.1% to 60.51%   |
| > 0.4761    | 100          | 86.77% to 100%     | 45.95        | 29.49% to 63.08%  |
| > 0.4941    | 96.15        | 80.36% to 99.9%    | 45.95        | 29.49% to 63.08%  |
| > 0.5502    | 96.15        | 80.36% to 99.9%    | 48.65        | 31.92% to 65.6%   |
| > 0.6203    | 96.15        | 80.36% to 99.9%    | 51.35        | 34.4% to 68.08%   |
| > 0.652     | 92.31        | 74.87% to 99.05%   | 51.35        | 34.4% to 68.08%   |
| > 0.6783    | 92.31        | 74.87% to 99.05%   | 54.05        | 36.92% to 70.51%  |
| > 0.6929    | 92.31        | 74.87% to 99.05%   | 56.76        | 39.49% to 72.9%   |
| > 0.7102    | 88.46        | 69.85% to 97.55%   | 56.76        | 39.49% to 72.9%   |
| > 0.7291    | 84.62        | 65.13% to 95.64%   | 56.76        | 39.49% to 72.9%   |
| > 0.768     | 80.77        | 60.65% to 93.45%   | 56.76        | 39.49% to 72.9%   |
| > 0.8102    | 76.92        | 56.35% to 91.03%   | 56.76        | 39.49% to 72.9%   |
| > 0.819     | 76.92        | 56.35% to 91.03%   | 59.46        | 42.1% to 75.25%   |
| > 0.8257    | 73.08        | 52.21% to 88.43%   | 59.46        | 42.1% to 75.25%   |
| > 0.8697    | 73.08        | 52.21% to 88.43%   | 62.16        | 44.76% to 77.54%  |
| > 0.9747    | 73.08        | 52.21% to 88.43%   | 64.86        | 47.46% to 79.79%  |
| > 1.051     | 73.08        | 52.21% to 88.43%   | 67.57        | 50.21% to 81.99%  |
| > 1.091     | 73.08        | 52.21% to 88.43%   | 70.27        | 53.02% to 84.13%  |
| > 1.12      | 69.23        | 48.21% to 85.67%   | 70.27        | 53.02% to 84.13%  |
| > 1.145     | 65.38        | 44.33% to 82.79%   | 70.27        | 53.02% to 84.13%  |
| > 1.182     | 61.54        | 40.57% to 79.77%   | 70.27        | 53.02% to 84.13%  |
| > 1.227     | 61.54        | 40.57% to 79.77%   | 72.97        | 55.88% to 86.21%  |
| > 1.261     | 57.69        | 36.92% to 76.65%   | 72.97        | 55.88% to 86.21%  |
| > 1.386     | 57.69        | 36.92% to 76.65%   | 75.68        | 58.8% to 88.23%   |
| > 1.54      | 57.69        | 36.92% to 76.65%   | 78.38        | 61.79% to 90.17%  |
| > 1.627     | 57.69        | 36.92% to 76.65%   | 81.08        | 64.84% to 92.04%  |
| > 1.693     | 53.85        | 33.37% to 73.41%   | 81.08        | 64.84% to 92.04%  |
| > 1.772     | 50           | 29.93% to 70.07%   | 81.08        | 64.84% to 92.04%  |
| > 1.89      | 50           | 29.93% to 70.07%   | 83.78        | 67.99% to 93.81%  |
| > 1.973     | 46.15        | 26.59% to 66.63%   | 83.78        | 67.99% to 93.81%  |
| > 2.012     | 42.31        | 23.35% to 63.08%   | 83.78        | 67.99% to 93.81%  |
| > 2.021     | 42.31        | 23.35% to 63.08%   | 86.49        | 71.23% to 95.46%  |
| > 2.053     | 38.46        | 20.23% to 59.43%   | 86.49        | 71.23% to 95.46%  |
| > 2.108     | 38.46        | 20.23% to 59.43%   | 89.19        | 74.58% to 96.97%  |
| > 2.27      | 38.46        | 20.23% to 59.43%   | 91.89        | 78.09% to 98.3%   |
| > 2.577     | 34.62        | 17.21% to 55.67%   | 91.89        | 78.09% to 98.3%   |
| > 2.797     | 30.77        | 14.33% to 51.79%   | 91.89        | 78.09% to 98.3%   |
| > 2.857     | 26.92        | 11.57% to 47.79%   | 91.89        | 78.09% to 98.3%   |
| > 2.991     | 23.08        | 8.974% to 43.65%   | 91.89        | 78.09% to 98.3%   |
| > 3.223     | 23.08        | 8.974% to 43.65%   | 94.59        | 81.81% to 99.34%  |
| > 4.038     | 19.23        | 6.555% to 39.35%   | 94.59        | 81.81% to 99.34%  |
| > 4.809     | 15.38        | 4.356% to 34.87%   | 94.59        | 81.81% to 99.34%  |
| > 4.913     | 11.54        | 2.446% to 30.15%   | 94.59        | 81.81% to 99.34%  |
| > 5.147     | 7.692        | 0.9455% to 25.13%  | 94.59        | 81.81% to 99.34%  |
| > 5.857     | 7.692        | 0.9455% to 25.13%  | 97.3         | 85.84% to 99.93%  |
| > 6.873     | 7.692        | 0.9455% to 25.13%  | 100          | 90.51% to 100%    |
| > 8.561     | 3.846        | 0.09733% to 19.64% | 100          | 90.51% to 100%    |
