# Supplementary material for: Association of Serum MiR-142-3p and MiR-101-3p Levels with Acute Cellular Rejection after Heart Transplantation
Source: PubMed Central journal article supplement (PMC5268768; doi:10.1371/journal.pone.0170842), 2017-01-26
Supplement: pone.0170842.s003.pdf [file pone.0170842.s003.pdf]

**S2 Table. ROC analysis of miR-101-3p**

| <b>Fold Change</b> | <b>Sensitivity%</b> | <b>95% CI</b>      | <b>Specificity%</b> | <b>95% CI</b>     |
|--------------------|---------------------|--------------------|---------------------|-------------------|
| 0.165"             | 100                 | 86.77% to 100%     | 2.703               | 0.0684% to 14.16% |
| > 0.1896           | 100                 | 86.77% to 100%     | 5.405               | 0.6615% to 18.19% |
| > 0.2112           | 100                 | 86.77% to 100%     | 8.108               | 1.704% to 21.91%  |
| > 0.2285           | 100                 | 86.77% to 100%     | 10.81               | 3.025% to 25.42%  |
| > 0.2645           | 100                 | 86.77% to 100%     | 13.51               | 4.537% to 28.77%  |
| > 0.2904           | 100                 | 86.77% to 100%     | 16.22               | 6.193% to 32.01%  |
| > 0.3014           | 100                 | 86.77% to 100%     | 18.92               | 7.962% to 35.16%  |
| > 0.3482           | 100                 | 86.77% to 100%     | 21.62               | 9.827% to 38.21%  |
| > 0.4091           | 96.15               | 80.36% to 99.9%    | 21.62               | 9.827% to 38.21%  |
| > 0.4478           | 96.15               | 80.36% to 99.9%    | 24.32               | 11.77% to 41.2%   |
| > 0.4659           | 92.31               | 74.87% to 99.05%   | 24.32               | 11.77% to 41.2%   |
| > 0.4802           | 92.31               | 74.87% to 99.05%   | 27.03               | 13.79% to 44.12%  |
| > 0.5038           | 92.31               | 74.87% to 99.05%   | 29.73               | 15.87% to 46.98%  |
| > 0.5437           | 92.31               | 74.87% to 99.05%   | 32.43               | 18.01% to 49.79%  |
| > 0.5884           | 88.46               | 69.85% to 97.55%   | 32.43               | 18.01% to 49.79%  |
| > 0.6109           | 88.46               | 69.85% to 97.55%   | 35.14               | 20.21% to 52.54%  |
| > 0.6164           | 88.46               | 69.85% to 97.55%   | 37.84               | 22.46% to 55.24%  |
| > 0.6345           | 84.62               | 65.13% to 95.64%   | 37.84               | 22.46% to 55.24%  |
| > 0.6568           | 84.62               | 65.13% to 95.64%   | 40.54               | 24.75% to 57.9%   |
| > 0.7187           | 80.77               | 60.65% to 93.45%   | 40.54               | 24.75% to 57.9%   |
| > 0.8595           | 80.77               | 60.65% to 93.45%   | 43.24               | 27.1% to 60.51%   |
| > 0.9533           | 80.77               | 60.65% to 93.45%   | 45.95               | 29.49% to 63.08%  |
| > 0.9916           | 80.77               | 60.65% to 93.45%   | 48.65               | 31.92% to 65.6%   |
| > 1.078            | 80.77               | 60.65% to 93.45%   | 51.35               | 34.4% to 68.08%   |
| > 1.136            | 76.92               | 56.35% to 91.03%   | 51.35               | 34.4% to 68.08%   |
| > 1.178            | 76.92               | 56.35% to 91.03%   | 54.05               | 36.92% to 70.51%  |
| > 1.22             | 76.92               | 56.35% to 91.03%   | 56.76               | 39.49% to 72.9%   |
| > 1.222            | 73.08               | 52.21% to 88.43%   | 56.76               | 39.49% to 72.9%   |
| > 1.242            | 73.08               | 52.21% to 88.43%   | 59.46               | 42.1% to 75.25%   |
| > 1.268            | 73.08               | 52.21% to 88.43%   | 62.16               | 44.76% to 77.54%  |
| > 1.345            | 73.08               | 52.21% to 88.43%   | 64.86               | 47.46% to 79.79%  |
| > 1.5              | 73.08               | 52.21% to 88.43%   | 67.57               | 50.21% to 81.99%  |
| > 1.604            | 73.08               | 52.21% to 88.43%   | 70.27               | 53.02% to 84.13%  |
| > 1.779            | 73.08               | 52.21% to 88.43%   | 72.97               | 55.88% to 86.21%  |
| > 2.096            | 73.08               | 52.21% to 88.43%   | 75.68               | 58.8% to 88.23%   |
| > 2.262            | 73.08               | 52.21% to 88.43%   | 78.38               | 61.79% to 90.17%  |
| > 2.3              | 73.08               | 52.21% to 88.43%   | 81.08               | 64.84% to 92.04%  |
| > 2.448            | 69.23               | 48.21% to 85.67%   | 81.08               | 64.84% to 92.04%  |
| > 2.577            | 65.38               | 44.33% to 82.79%   | 81.08               | 64.84% to 92.04%  |
| > 2.613            | 61.54               | 40.57% to 79.77%   | 81.08               | 64.84% to 92.04%  |
| > 2.639            | 57.69               | 36.92% to 76.65%   | 81.08               | 64.84% to 92.04%  |
| > 2.7              | 57.69               | 36.92% to 76.65%   | 83.78               | 67.99% to 93.81%  |
| > 2.883            | 53.85               | 33.37% to 73.41%   | 83.78               | 67.99% to 93.81%  |
| > 3.119            | 50                  | 29.93% to 70.07%   | 83.78               | 67.99% to 93.81%  |
| > 3.262            | 46.15               | 26.59% to 66.63%   | 83.78               | 67.99% to 93.81%  |
| > 3.333            | 46.15               | 26.59% to 66.63%   | 86.49               | 71.23% to 95.46%  |
| > 3.377            | 42.31               | 23.35% to 63.08%   | 86.49               | 71.23% to 95.46%  |
| > 3.434            | 38.46               | 20.23% to 59.43%   | 86.49               | 71.23% to 95.46%  |
| > 3.525            | 34.62               | 17.21% to 55.67%   | 86.49               | 71.23% to 95.46%  |
| > 3.808            | 34.62               | 17.21% to 55.67%   | 89.19               | 74.58% to 96.97%  |
| > 4.3              | 30.77               | 14.33% to 51.79%   | 89.19               | 74.58% to 96.97%  |
| > 4.633            | 26.92               | 11.57% to 47.79%   | 89.19               | 74.58% to 96.97%  |
| > 4.717            | 26.92               | 11.57% to 47.79%   | 91.89               | 78.09% to 98.3%   |
| > 4.738            | 23.08               | 8.974% to 43.65%   | 91.89               | 78.09% to 98.3%   |
| > 4.819            | 19.23               | 6.555% to 39.35%   | 91.89               | 78.09% to 98.3%   |
| > 5.571            | 15.38               | 4.356% to 34.87%   | 91.89               | 78.09% to 98.3%   |
| > 6.851            | 11.54               | 2.446% to 30.15%   | 91.89               | 78.09% to 98.3%   |
| > 7.459            | 11.54               | 2.446% to 30.15%   | 94.59               | 81.81% to 99.34%  |
| > 7.809            | 11.54               | 2.446% to 30.15%   | 97.3                | 85.84% to 99.93%  |
| > 8.145            | 7.692               | 0.9455% to 25.13%  | 97.3                | 85.84% to 99.93%  |
| > 8.152            | 3.846               | 0.09733% to 19.64% | 97.3                | 85.84% to 99.93%  |
| > 9.676            | 3.846               | 0.09733% to 19.64% | 100                 | 90.51% to 100%    |
