# Supplementary material for: Association of Serum MiR-142-3p and MiR-101-3p Levels with Acute Cellular Rejection after Heart Transplantation
Source: PubMed Central journal article supplement (PMC5268768; doi:10.1371/journal.pone.0170842), 2017-01-26
Supplement: pone.0170842.s004.pdf [file pone.0170842.s004.pdf]

**S3 Table. CRP level (mg/L) in NR vs. ACR groups**

| NR   | ACR |
|------|-----|
| 55.5 | 0.3 |
| 1.4  | 7.4 |
| 85.4 | 4.4 |
| 24.1 | 1.8 |
| 1.8  |     |
| 49.3 |     |
| 8    |     |
