# Supplementary material for: Association of Serum MiR-142-3p and MiR-101-3p Levels with Acute Cellular Rejection after Heart Transplantation
Source: PubMed Central journal article supplement (PMC5268768; doi:10.1371/journal.pone.0170842), 2017-01-26
Supplement: pone.0170842.s005.pdf [file pone.0170842.s005.pdf]

**S4 Table. Tacrolimus level (ug/L) in NR vs. ACR groups**

| NR   | ACR |
|------|-----|
| 11.4 | 8   |
| 13.6 | 10  |
| 10.8 | 15  |
| 17   | 8   |
| 9.9  | 11  |
| 12.7 |     |
| 13.4 |     |
| 14.5 |     |
| 21   |     |
| 21.2 |     |
| 8.7  |     |
| 16.6 |     |
| 2    |     |
| 2.7  |     |
| 24.1 |     |
| 22.8 |     |
| 9.2  |     |
| 5    |     |
| 7    |     |
| 12   |     |
| 23   |     |
| 15   |     |
| 9    |     |
| 9    |     |
