# Supplementary material for: Association of Serum MiR-142-3p and MiR-101-3p Levels with Acute Cellular Rejection after Heart Transplantation
Source: PubMed Central journal article supplement (PMC5268768; doi:10.1371/journal.pone.0170842), 2017-01-26
Supplement: pone.0170842.s006.pdf [file pone.0170842.s006.pdf]

**S5 Table. Creatinine level (umol/L) in NR vs. ACR groups**

| <b>NR</b> | <b>ACR</b> |
|-----------|------------|
| 147       | 130        |
| 174       | 90         |
| 152       | 97         |
| 84        | 88         |
| 167       | 163        |
| 204       | 121        |
| 84        | 108        |
| 168       | 103        |
| 135       | 192        |
| 309       | 159        |
| 90        | 127        |
| 169       | 136        |
| 76        | 59         |
| 152       | 89         |
| 143       | 100        |
| 122       | 82         |
| 95        | 124        |
| 96        | 72         |
| 92        | 103        |
| 139       | 58         |
| 78        | 78         |
| 76        | 82         |
| 215       | 96         |
| 111       | 137        |
| 99        | 116        |
| 327       | 103        |
| 77        |            |
| 80        |            |
| 78        |            |
| 158       |            |
| 119       |            |
| 163       |            |
| 145       |            |
| 137       |            |
| 92        |            |
| 63        |            |
| 113       |            |
